# Supplementary figures and images for: Adhesive tape for spatially resolved and sensitive detection of lead in dust using XRF
Source: Royal Society of Chemistry journal article supplement (doi:10.1039/d5ay01275a), 2025-11-21

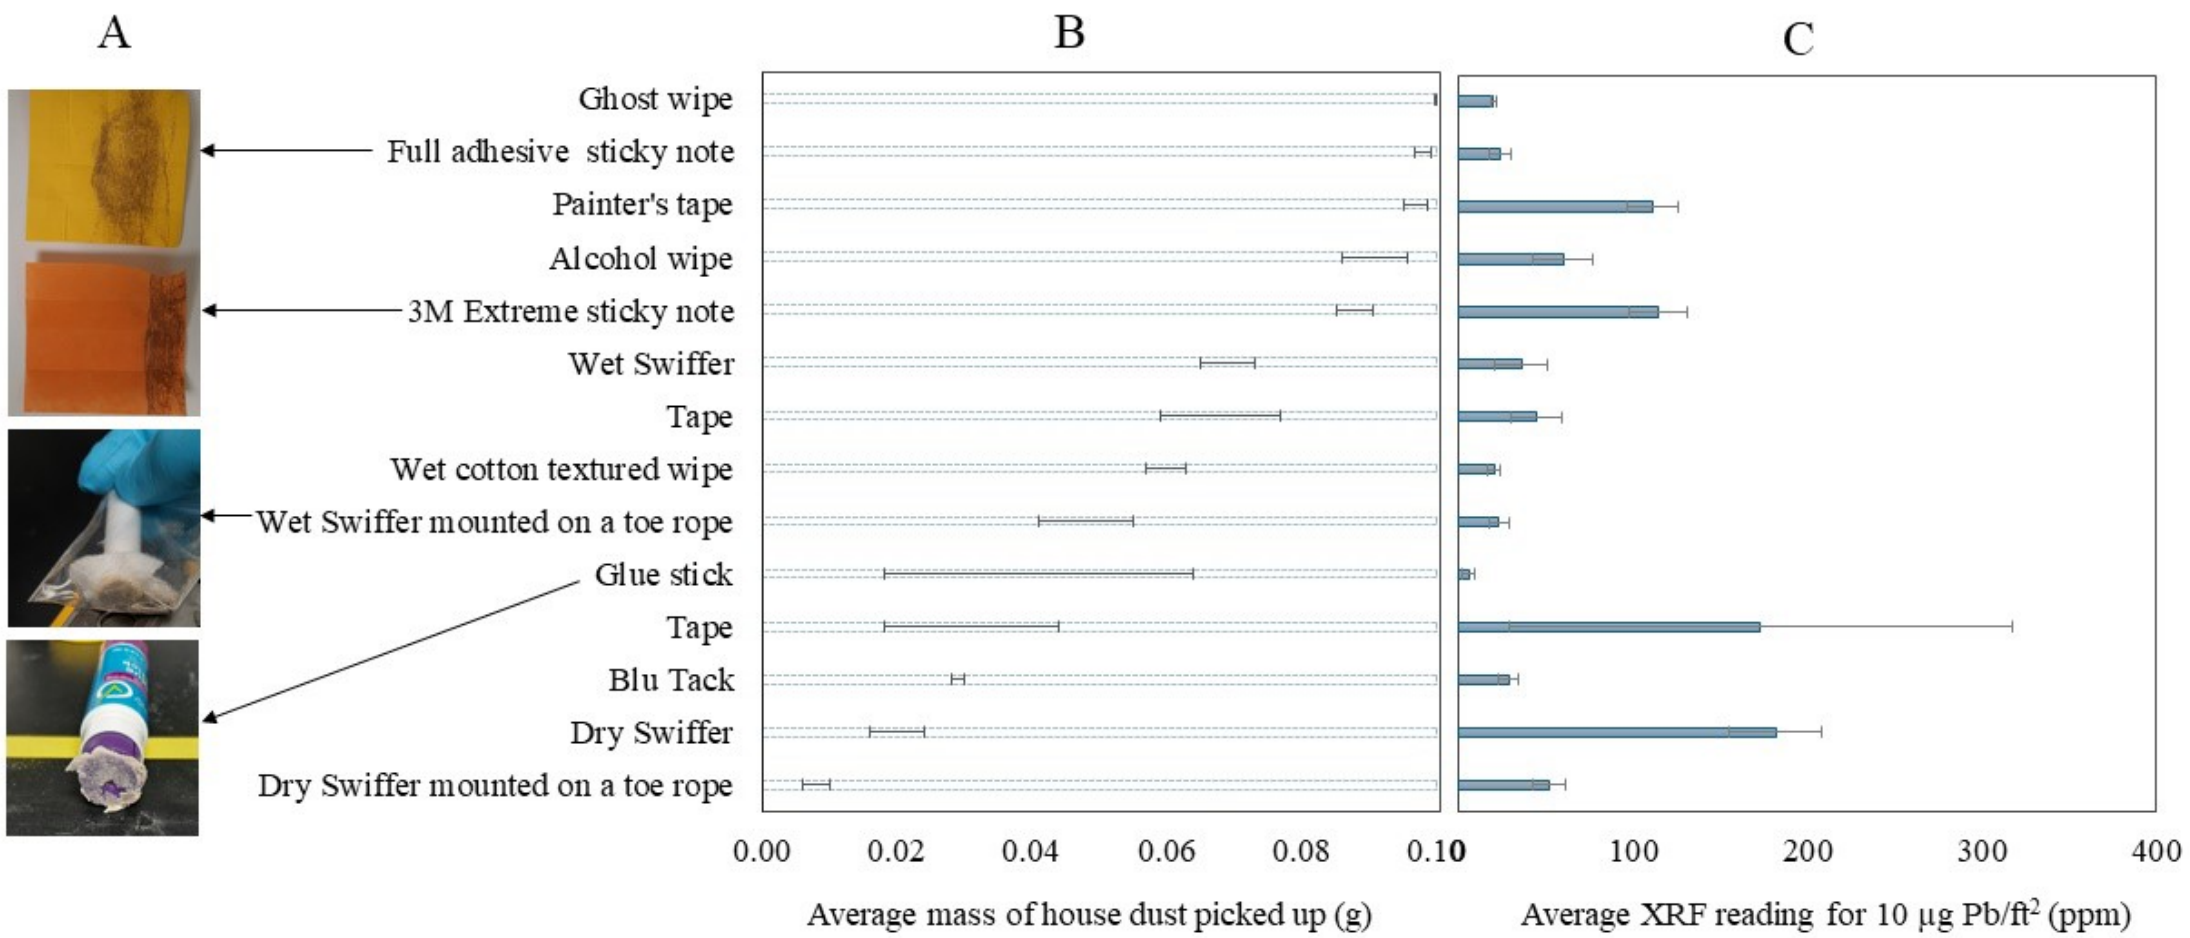

Supplement: d5ay01275a2.pdf [file d5ay01275a2.pdf]

### Variation of XRF reading with size of Painter's tape used

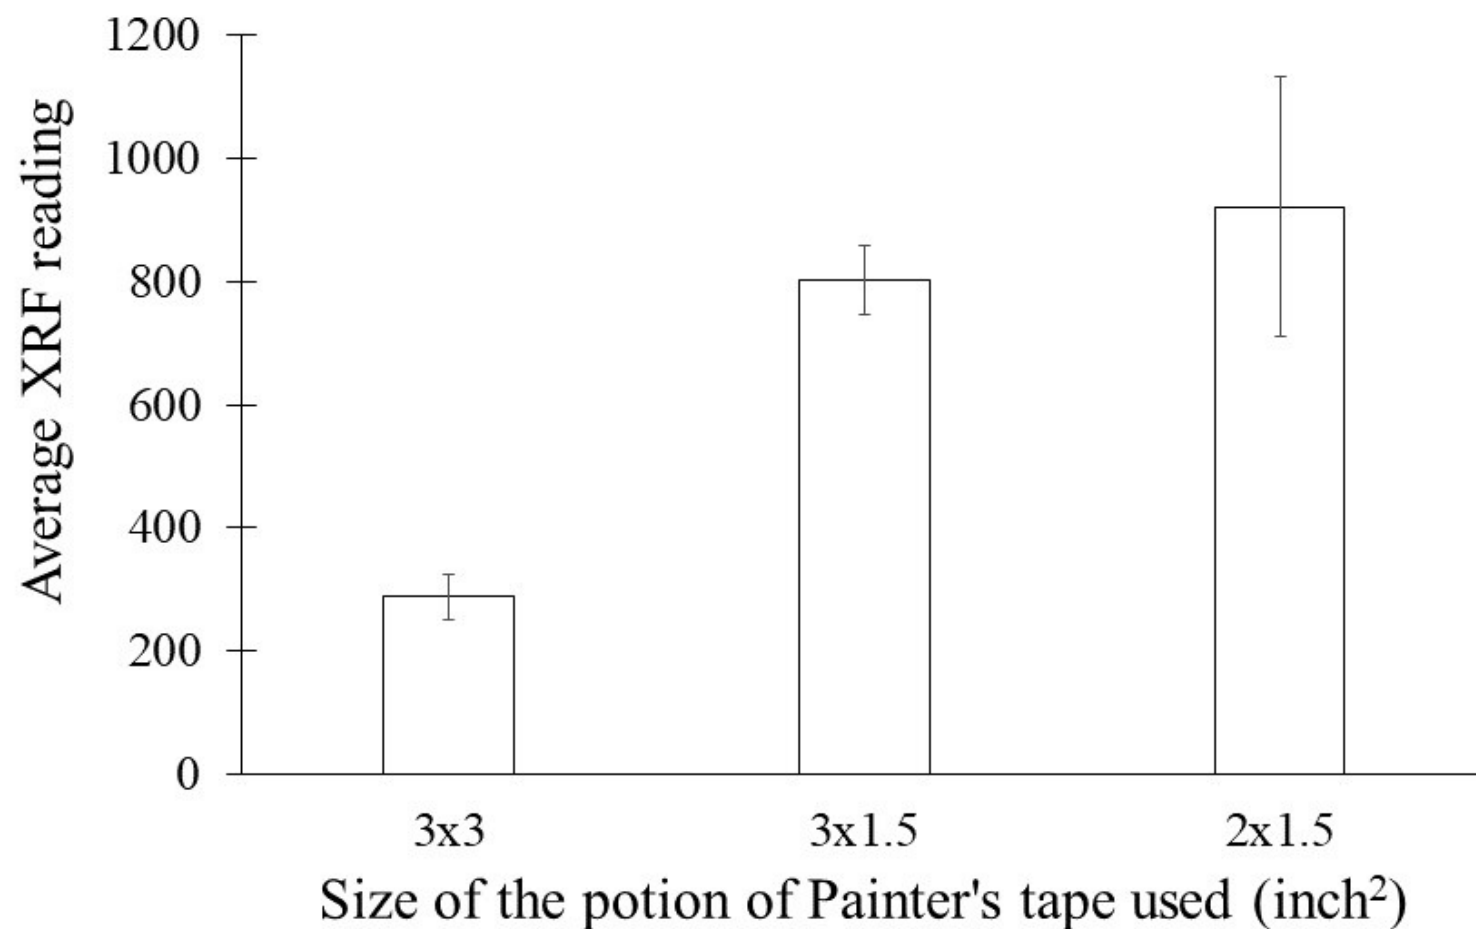

Supplement: d5ay01275a3.pdf [file d5ay01275a3.pdf]
